# Supplementary material
Source: MDPI journal article supplement (https://www.mdpi.com/2073-4344/12/11/1363)
Supplement: s1 [file s1]

## Supporting Information for

### Core-shell hierarchical Fe/Cu bimetallic Fenton catalyst with improved adsorption and catalytic performance for Congo red degradation

Haimei Chen<sup>a</sup>, Shaofei Wang<sup>b</sup>, Lilan Huang<sup>a\*</sup>, Leitao Zhang<sup>c</sup>, Jin Han<sup>a</sup>, Wanzheng Ren<sup>a</sup>, Jian Pan<sup>a\*</sup>, Jiao Li<sup>a\*</sup>

<sup>a</sup>School of Material Science and Engineering, Shandong University of Technology, Zibo 255049, China

<sup>b</sup>College of Chemistry and Chemical Engineering, Hunan University, Changsha 410082, China

<sup>c</sup>School of Chemical Engineering and Pharmaceuticals, Henan University of Science and Technology, Luoyang, Henan 471000, China

\*Corresponding author: Lilan Huang, Email: huanglilan@sdut.edu.cn; Jian Pan, Email: panjian@sdut.edu.cn; Jiao Li, Email: haiyan9943@163.com

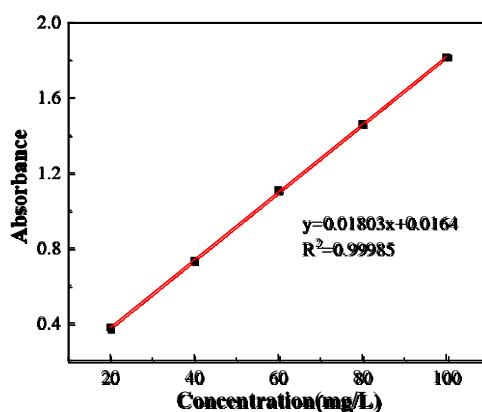

Figure S1 The standard curve of Congo red

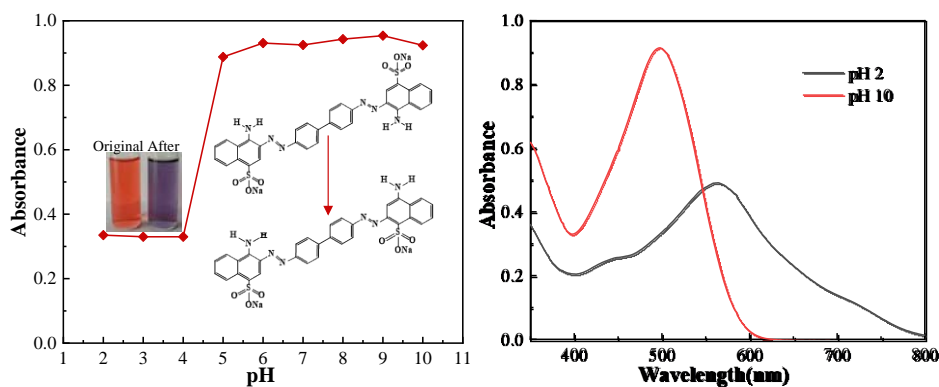

Figure S2 The effect of pH on absorbance of Congo red solution

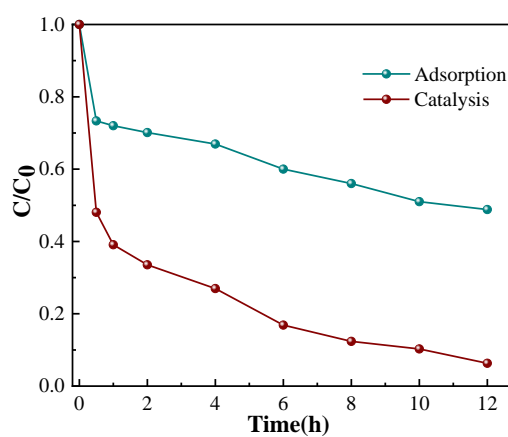

**Figure S3** Adsorption and catalysis comparison

The iron and copper leaching in CR degradation of 4A-Fe@Cu was investigated and the results are shown in Figure S4. The maximum value of iron and copper leaching of catalyst is 0.048 mg/L and 0.094 mg/L. The low values indicate that the prepared catalyst is relatively stable.

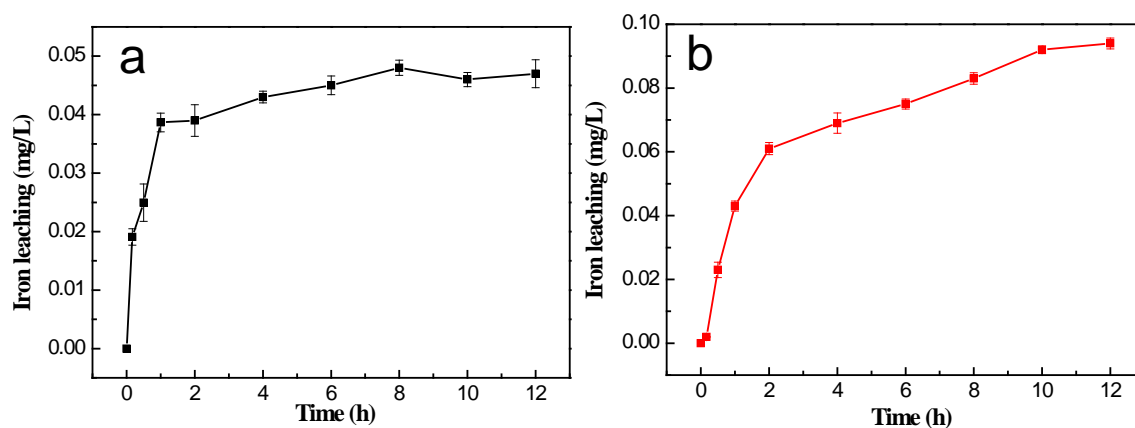

**Figure S4** Iron (a) and Copper (b) leaching in CR degradation of 4A-Fe@Cu. Reaction conditions: pH 8, 2 g/L catalysts, 1 g/L CR solution, 7.2 mM H<sub>2</sub>O<sub>2</sub>.
